# Supplementary material
Source: MDPI journal article supplement (https://www.mdpi.com/2571-8789/7/4/112)
Supplement: s1 [file s1]

## Supplementary Material

**Figure S1. The random amplified polymorphic DNA (RAPD) profile of *S. meliloti* Algerian isolates.** Dendrogram based on UPGMA clustering of Jaccard similarity coefficient of combined AP5 and P7 RAPD fingerprints of rhizobial strains.

**Figure S2. Germination of *M. sativa* cultivars Etrusca and Marina under different concentrations of NaCl.** Five biological replicates for each condition are reported, the error bars indicate the standard errors. Horizontal lines of boxes represent the mean values, whereas the whiskers represent mean values  $\pm$  standard deviation. Different letters indicate statistically significant differences among all conditions tested (Kruskal-Wallis, Post-hoc test: Dunn's multi-comparative test,  $p < 0.05$ ).

**Figure S3. Plant parameters of *M. sativa* cultivars Etrusca and Marina influenced by NaCl gradient.** Boxplots of (A) Root length (cm) (B) Stem length (cm) and (C) Dry weight (g) from eight biological replicates. Horizontal lines of boxes represent the mean values, whereas the whiskers represent mean values  $\pm$  standard deviation. Different letters indicate statistically significant differences among conditions tested (Kruskal-Wallis, Post-hoc test: Dunn's multi-comparative test,  $p < 0.05$ ). In (C) the mortality of *Medicago sativa* cultivars Marina and Etrusca under saline conditions is reported as the percentage of harvested death plants for each concentration of sodium chloride tested.

**Figure S4. Experimental set-up for nodulation assays.** (A) Growth chamber (B) *M. sativa* cv. Etrusca at 0 and 100 mM NaCl (negative control; no inoculation), (C) *M. sativa* cv. Etrusca plants inoculated with *S. meliloti* MO47(2) at 0 and 100 mM NaCl.

**Figure S5. Survival of *S. meliloti* Algerian strains in compost at 4–6 °C.** Each point represents average value of decimal logarithmic of viable cells for  $g^{-1}$  inoculant calculated on three replicates (with three independent counts *per* replicate). The error bars indicate the standard errors. Different letters indicate statistically significant differences (ANOVA, Post-hoc test: Tuckey test post-hoc,  $p < 0.05$ ).

**Figure S6. Temperature and rainfall recorded during the field experiment.** Maximum temperature, minimum temperature and rainfall were recorded at Montespertoli – Florence meteo station.

**Figure S7. Alfalfa yield with different inoculant treatments in the field trial.** Boxplot of wet weight (kg/ha) (A) and estimated dry weight (kg/ha) (B) of different inoculants formulated with *S. meliloti* strains MA10(1), MO35(1), MO15(1), GR4, MO56(1), negative control indicates unfertilized parcels sowed with un-inoculated seeds, positive control indicates fertilized parcels sowed with un-inoculated seeds. Horizontal lines of boxes represent the median, whereas the whiskers represent the maximal and minimal values. Asterisks indicates significant differences based on pairwise comparison between inoculants tested (T-test: ns for not significant, \* for  $p < 0.05$ ; \*\* for  $p < 0.01$ ; \*\*\* for  $p < 0.001$ ).

**Table S1. List of *S. meliloti* strains used in this work.**

**Table S2. Main soil physico-chemical characteristics and count of indigenous nodulating rhizobia (Most Probable Number) of field experiments.**

**Table S3. Growth profiles of the rhizobia strains at 100 mM NaCl detected with Biolog Technology.** For each replicate, normalized value was calculated as of the ratio of the Arbitrary OmniLog Units (AOU) detected at 100 mM NaCl concentration on the average value of AOU detected at the concentration of 0 mM of related strain. Data were expressed as the average of normalized values.

**Table S4. Tuckey test post-hoc outputs on percentage of germination of *M. sativa* cultivars Marina and Etrusca at different NaCl concentrations.** Values in tables indicate means of percentage of germination. Different superscript capital letters indicate results of Tuckey test post-hoc among NaCl concentrations for each cultivar. Different superscript small letters indicate results of Tuckey test post-hoc between two cultivars for each concentration of NaCl.

**Table S5. Mortality of *M. sativa* cultivars Marina and Etrusca in association with 21 *S. meliloti* in presence of salt.** The percentage of harvested death plants of both cultivars are reported for each concentration of sodium chloride tested in symbiosis with each Algerian strains tested. Mean and standard error values are reported.

**Table S6. Count of viable cells of *S. meliloti* strains on the *M. sativa* cultivar Marina seed coated with compost.** Mean values and standard error of three independent replicate are reported for each strain. Superscript letters indicate results of Tuckey test post-hoc between the *S. meliloti* strains tested.

**File S1 (excel). Pairwise comparisons among *S. meliloti* Algerian strains tested in *M. sativa* cultivars Marina and Etrusca** For each tested strains and for each growth plant parameters, p-values

of non-parametric Wilcoxon test i) between 0 and 100 mM NaCl and ii) between cultivars are reported.

## Supplementary Figures

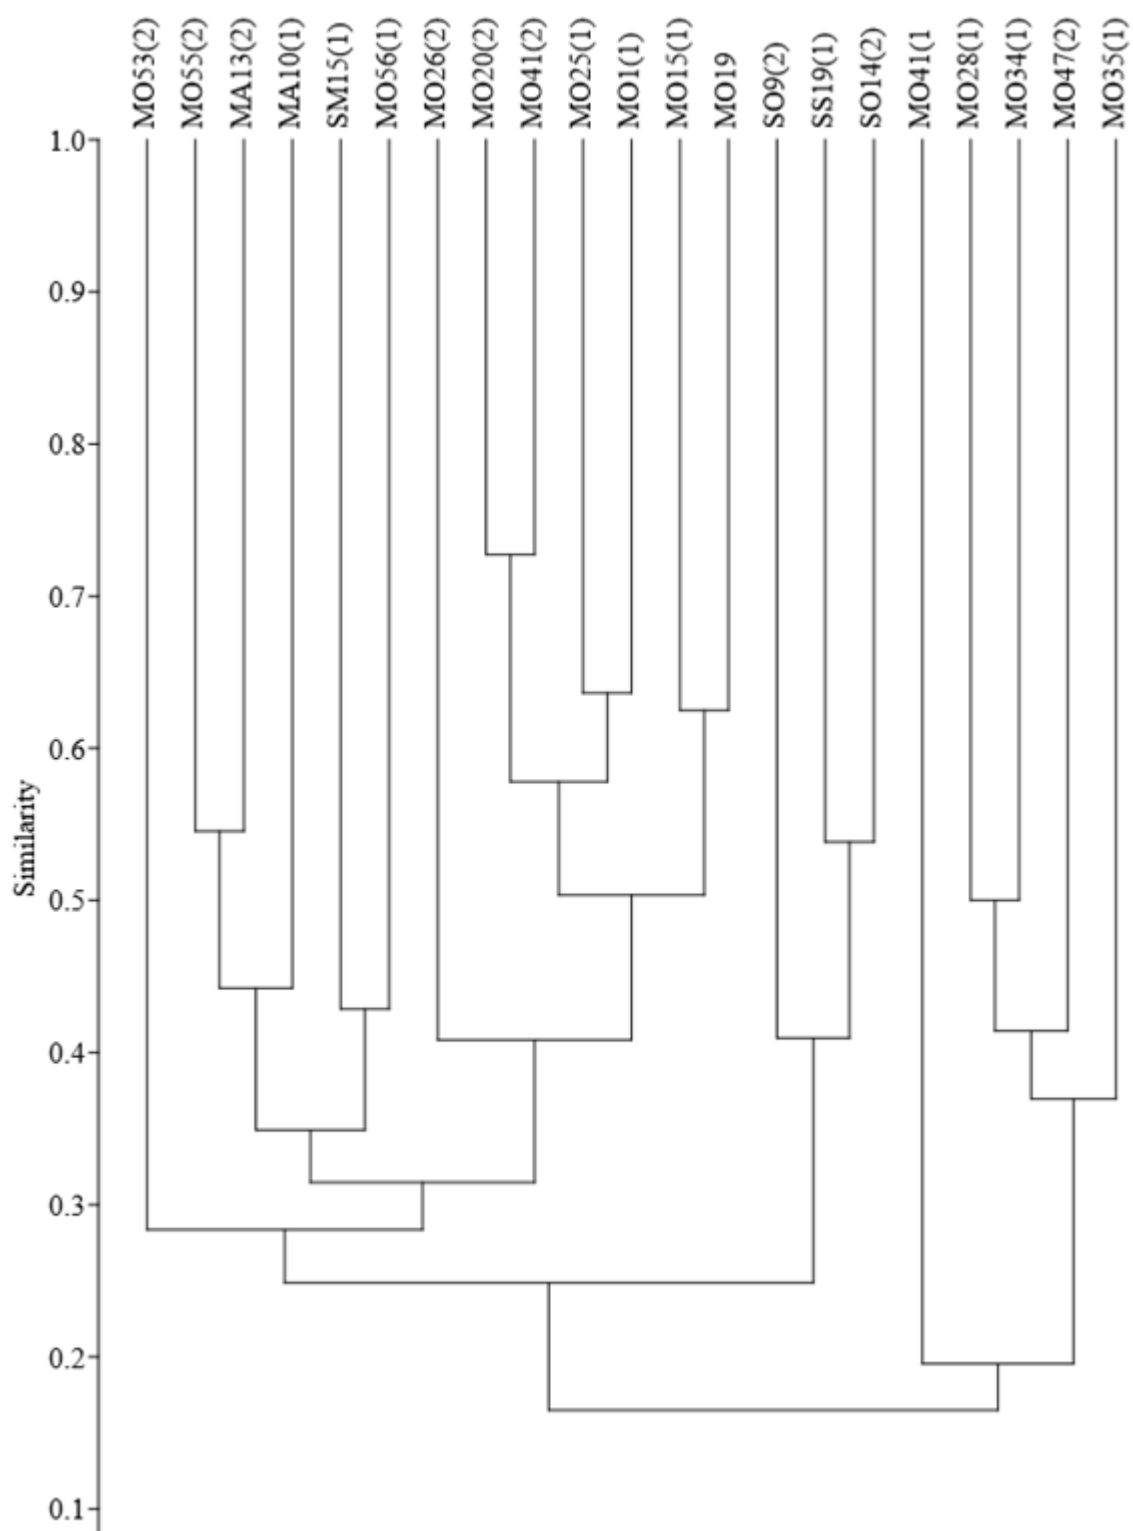

**Figure S1. The random amplified polymorphic DNA (RAPD) profile of *S. meliloti* Algerian isolates.** Dendrogram based on UPGMA clustering of Jaccard similarity coefficient of combined AP5 and P7 RAPD fingerprints of rhizobial strains.

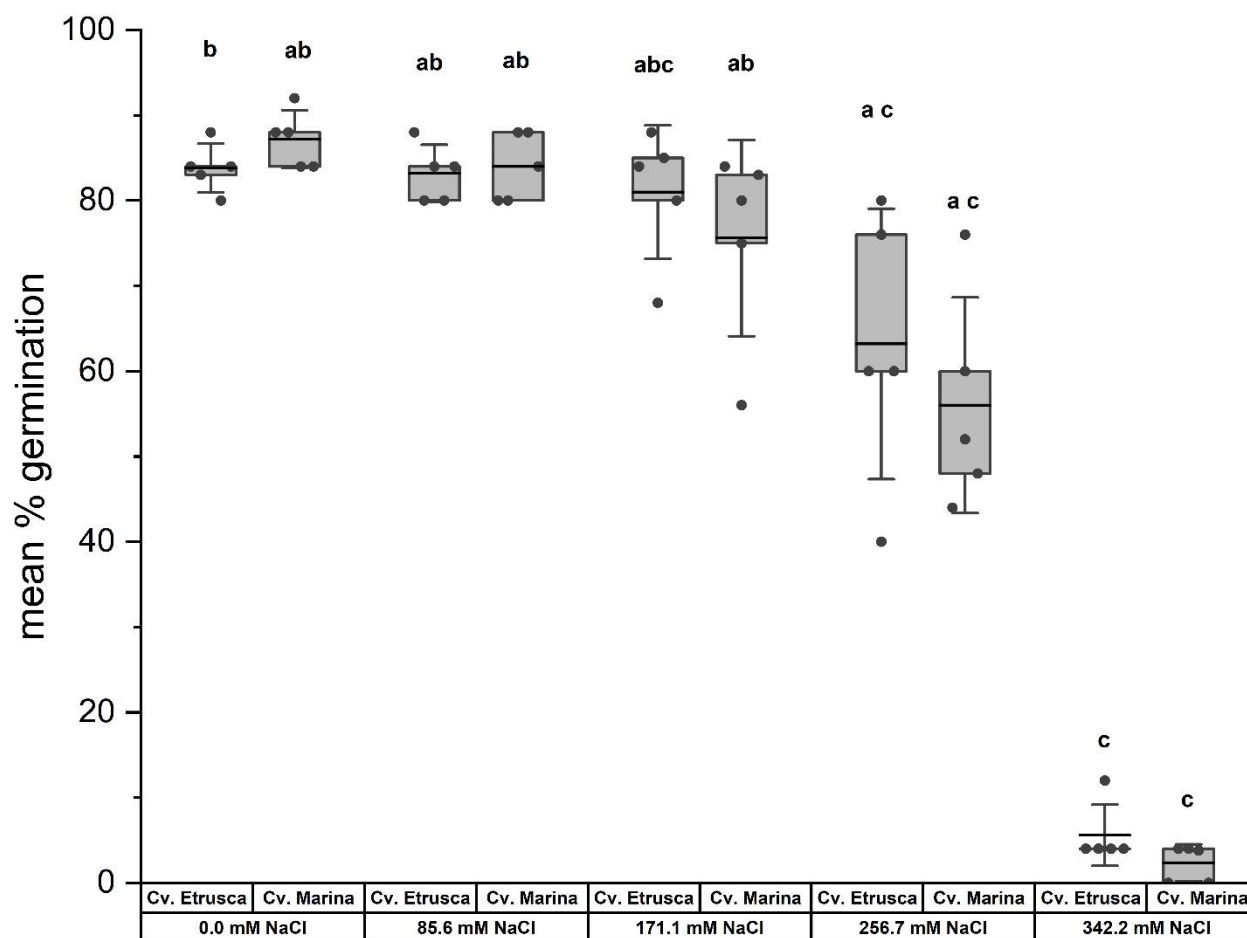

**Figure S2. Germination of *M. sativa* cultivars Etrusca and Marina under different concentrations of NaCl.** Five biological replicates for each condition are reported, the error bars indicate the standard errors. Horizontal lines of boxes represent the mean values, whereas the whiskers represent mean values  $\pm$  standard deviation. Different letters indicate statistically significant differences among all conditions tested (Kruskal-Wallis, Post-hoc test: Dunn's multi-comparative test,  $p < 0.05$ ).

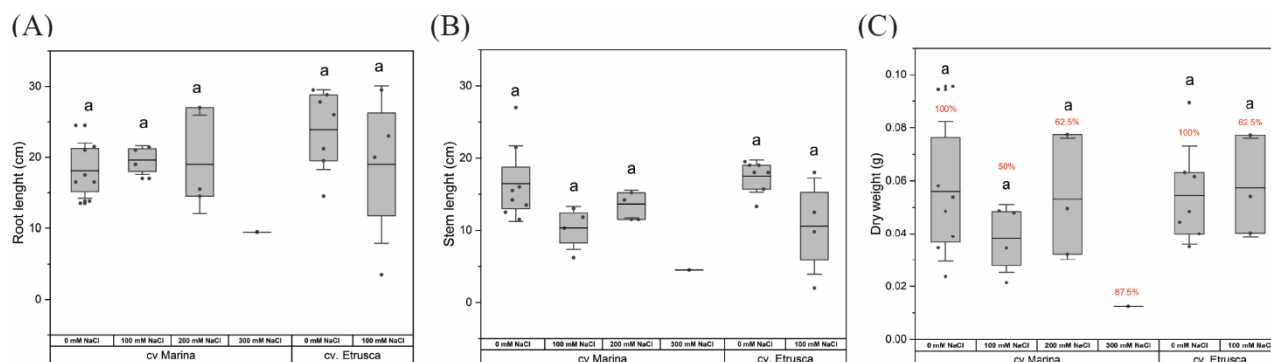

**Figure S3. Plant parameters of *M. sativa* cultivars Etrusca and Marina influenced by NaCl gradient.** Boxplots of (A) Root length (cm) (B) Stem length (cm) and (C) Dry weight (g) from eight biological replicates. Horizontal lines of boxes represent the mean values, whereas the whiskers represent mean values  $\pm$  standard deviation. Different letters indicate statistically significant differences among conditions tested (Kruskal-Wallis, Post-hoc test: Dunn's multi-comparative test,  $p < 0.05$ ). In (C) the mortality of *Medicago sativa* cultivars Marina and Etrusca under saline conditions is reported as the percentage of harvested death plants for each concentration of sodium chloride tested.

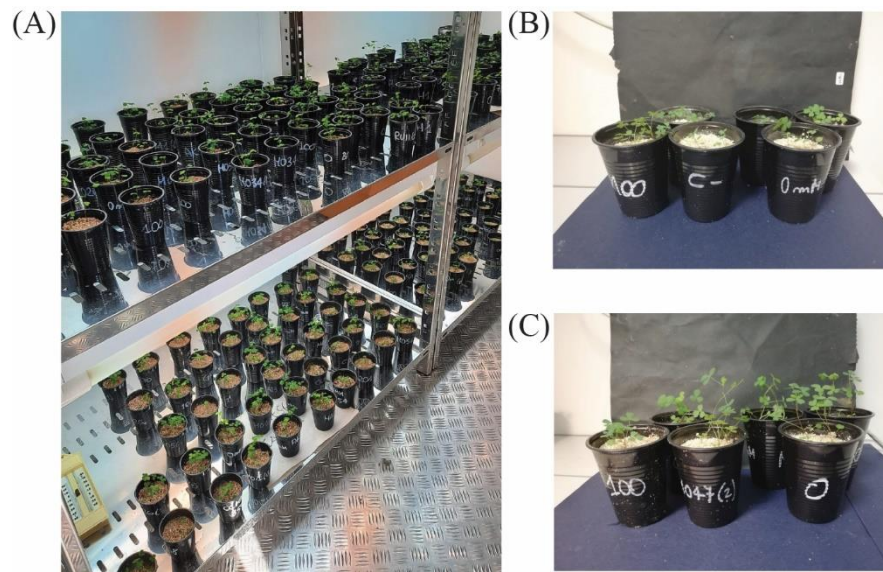

**Figure S4. Experimental set-up for nodulation assays.** (A) Growth chamber (B) *M. sativa* cv. Etrusca at 0 and 100 mM NaCl (negative control; no inoculation), (C) *M. sativa* cv. Etrusca plants inoculated with *S. meliloti* MO47(2) at 0 and 100 mM NaCl.

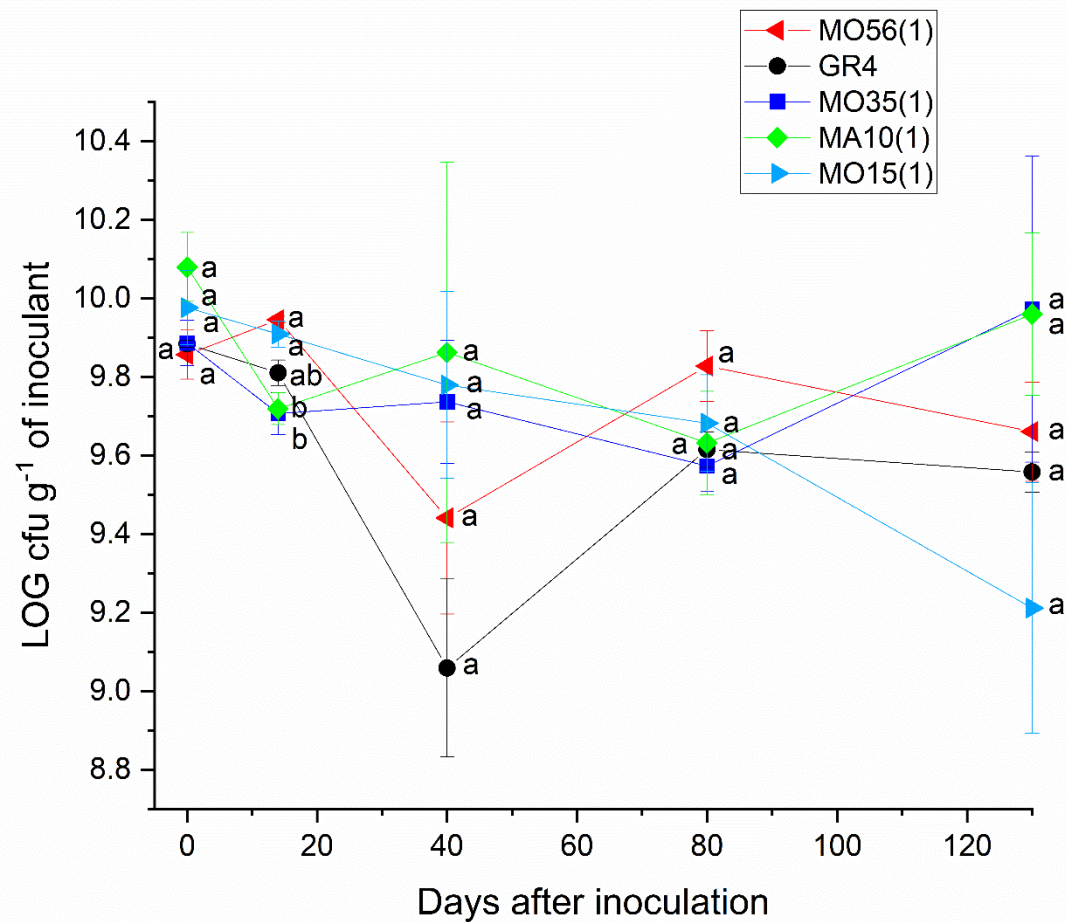

**Figure S5. Survival of *S. meliloti* Algerian strains in compost at 4–6 °C.** Each point represents average value of decimal logarithmic of viable cells for g<sup>-1</sup> inoculant calculated on three replicates (with three independents counts *per* replicate). The error bars indicate the standard errors. Different letters indicate statistically significant differences (ANOVA, Post-hoc test: Tuckey test post-hoc, p<0.05).



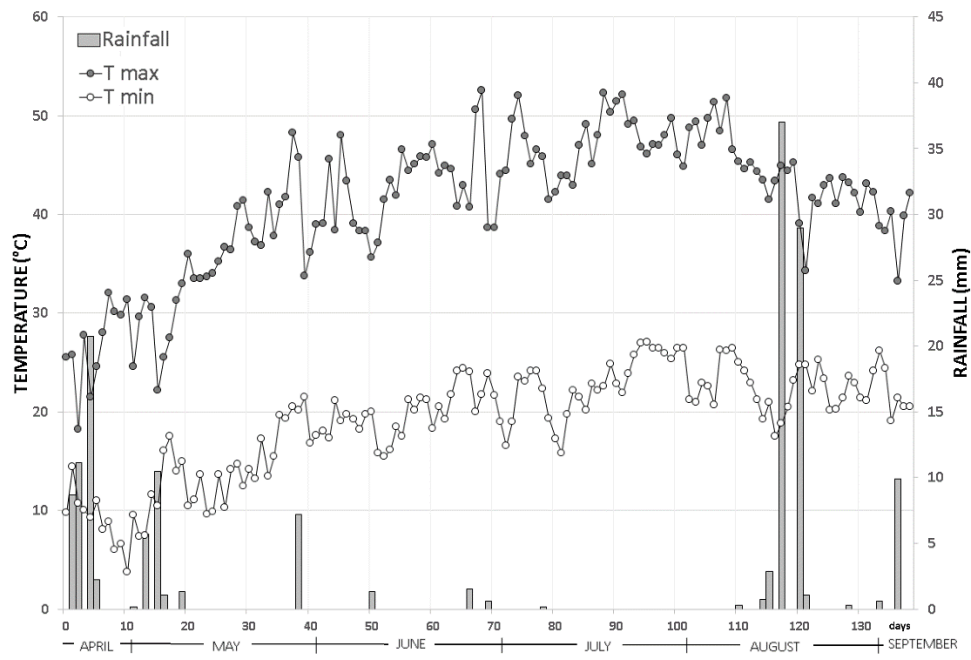

**Figure S6. Temperature and rainfall recorded during the field experiment.** Maximum temperature, minimum temperature and rainfall were recorded at Montespertoli – Florence meteo station.

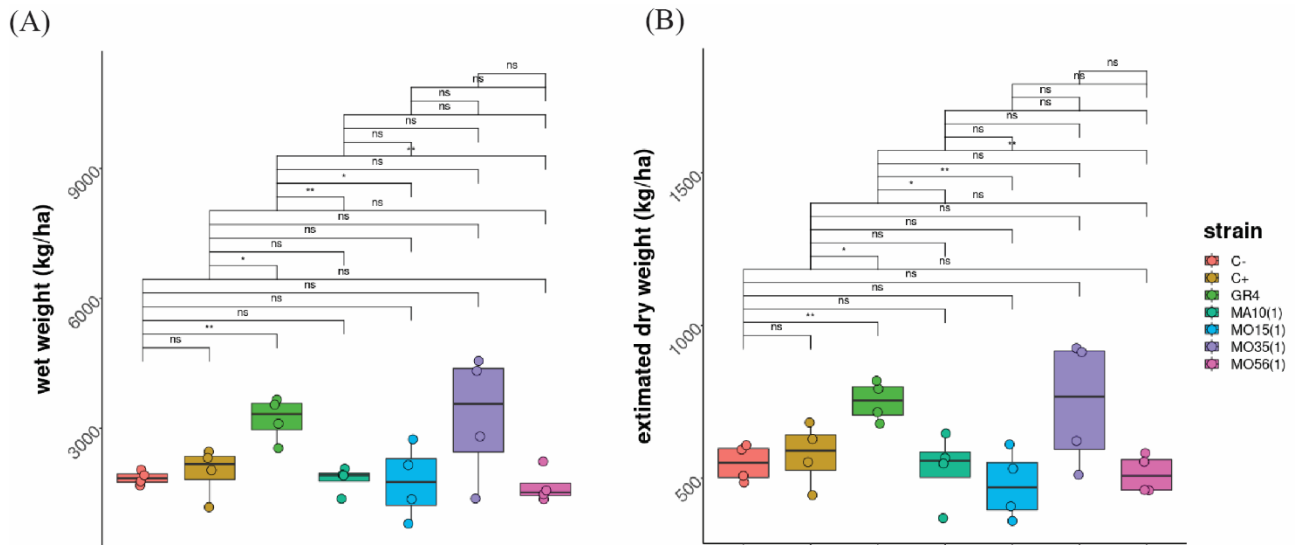

**Figure S7. Alfalfa yield with different inoculant treatments in the field trial.** Boxplot of wet weight (kg/ha) (A) and estimated dry weight (kg/ha) (B) of different inoculants formulated with *S. meliloti* strains MA10(1), MO35(1), MO15(1), GR4, MO56(1), negative control indicates unfertilized parcels sowed with un-inoculated seeds, positive control indicates fertilized parcels sowed with un-inoculated seeds. Horizontal lines of boxes represent the median, whereas the whiskers represent the maximal and minimal values. Asterisks indicates significant differences based on pairwise comparison between inoculants tested (T-test: ns for not significant, \* for  $p < 0.05$ ; \*\* for  $p < 0.01$ ; \*\*\* for  $p < 0.001$ ).

## SUPPLEMENTARY TABLES

**Table S1. List of *S. meliloti* strains used in this work.**

| Strain name    | Geographical site                  | Soil salinity level | GenBank accession number for 16S rDNA nucleotide sequence | BlastN<br>Accession number (% identity) |
|----------------|------------------------------------|---------------------|-----------------------------------------------------------|-----------------------------------------|
| <b>MA10(1)</b> | Fleuris ( W. Oran)                 | Moderately saline   | OQ621320                                                  | NR_113670 (100%)                        |
| <b>MA13(2)</b> | Fleuris ( W. Oran)                 | Moderately saline   | OQ621325                                                  | NR_113670 (100%)                        |
| <b>MO1(1)</b>  | Fleuris ( W. Oran)                 | Moderately saline   | OQ621319                                                  | NR_113670 (100%)                        |
| <b>MO15(1)</b> | Fleuris ( W. Oran)                 | Moderately saline   | OQ621322                                                  | NR_113670 (100%)                        |
| <b>MO19</b>    | Fleuris ( W. Oran)                 | Moderately saline   | OQ621331                                                  | NR_113670 (100%)                        |
| <b>MO20(2)</b> | Fleuris ( W. Oran)                 | Moderately saline   | OQ621335                                                  | NR_113670 (99.92%)                      |
| <b>MO25(1)</b> | Fleuris ( W. Oran)                 | Moderately saline   | OQ621328                                                  | NR_113670 (99.92%)                      |
| <b>MO26(2)</b> | Fleuris ( W. Oran)                 | Moderately saline   | OQ621323                                                  | NR_113670 (100%)                        |
| <b>MO28(1)</b> | Fleuris ( W. Oran)                 | Moderately saline   | OQ621333                                                  | NR_113670 (100%)                        |
| <b>MO34(1)</b> | Fleuris ( W. Oran)                 | Moderately saline   | OQ621327                                                  | NR_113670 (100%)                        |
| <b>MO35(1)</b> | Fleuris ( W. Oran)                 | Moderately saline   | OQ621324                                                  | NR_113670 (100%)                        |
| <b>MO4(2)</b>  | Fleuris ( W. Oran)                 | Moderately saline   | OQ621334                                                  | NR_113670 (100%)                        |
| <b>MO41(1)</b> | Fleuris ( W. Oran)                 | Moderately saline   | OQ621338                                                  | NR_043399 (99.66%)                      |
| <b>MO47(2)</b> | Fleuris ( W. Oran)                 | Moderately saline   | OQ621332                                                  | NR_113670 (99.92%)                      |
| <b>MO53(2)</b> | Fleuris ( W. Oran)                 | Moderately saline   | OQ621330                                                  | NR_113670 (99.92%)                      |
| <b>MO55(2)</b> | Fleuris ( W. Oran)                 | Moderately saline   | OQ621339                                                  | NR_043399 (99.66%)                      |
| <b>MO56(1)</b> | Fleuris ( W. Oran)                 | Moderately saline   | OQ621329                                                  | NR_113670 (99.92%)                      |
| <b>SM15(1)</b> | El Malah ( W. d'Ain Témouchent)    | Moderately saline   | OQ621336                                                  | NR_113670 (99.92%)                      |
| <b>SO14(2)</b> | Oued Sebbah (W. d'Ain Témouchent)) | Saline              | OQ621321                                                  | NR_113670 (100%)                        |
| <b>SO9(2)</b>  | Oued Sebbah (W. d'Ain Témouchent)  | Saline              | OQ621326                                                  | NR_113670 (99.92%)                      |
| <b>SS19(1)</b> | Es Senia (Oran)                    | Not saline          | OQ621337                                                  | NR_113670 (99.92%)                      |

**Table S2. Main soil physico-chemical characteristics and count of indigenous nodulating rhizobia of field experiments.**

| Parameter                                            | Units                      | Values               |
|------------------------------------------------------|----------------------------|----------------------|
| Gravel                                               | %                          | 6.3                  |
| Sand                                                 | %                          | 20.2                 |
| Silt                                                 | %                          | 46.3                 |
| Clay                                                 | %                          | 32.9                 |
| Texture                                              | -                          | Clay loam            |
| pH (H <sub>2</sub> O)                                | -                          | 8.3                  |
| C.E.C.                                               | mequiv.100 g <sup>-1</sup> | 17.6                 |
| Available P <sub>2</sub> O <sub>5</sub> <sup>a</sup> | mg kg <sup>-1</sup>        | 13.4                 |
| Organic matter                                       | %                          | 1.5                  |
| Total N                                              | g kg <sup>-1</sup>         | 1.1                  |
| C/N                                                  | -                          | 8.0                  |
| <i>S. meliloti</i> MPN <sup>b</sup>                  | cell g <sup>-1</sup>       | 2.04 10 <sup>5</sup> |

<sup>a</sup> Olsen method

<sup>b</sup> Most probable number (MPN) of nodulating rhizobia count *per* gram of soil

**Table S3. Growth profiles of the rhizobia strains at 100 mM NaCl detected with Biolog Technology.** For each replicate, normalized value was calculated as of the ratio of the Arbitrary OmniLog Units (AOU) detected at 100 mM NaCl concentration on the average value of AOU detected at the concentration of 0 mM of related strain. Data were expressed as the average of normalized values.

| Strain  | Metabolic activity at 0 mM NaCl | Metabolic activity at 100 mM NaCl |
|---------|---------------------------------|-----------------------------------|
| MA10(1) | 1                               | 0.960                             |
| MA13(2) | 1                               | 0.980                             |
| MO1(1)  | 1                               | 0.947                             |
| MO4(2)  | 1                               | 0.940                             |
| MO15(1) | 1                               | 0.957                             |
| MO19    | 1                               | 0.933                             |
| MO20(2) | 1                               | 0.950                             |
| MO25(1) | 1                               | 0.947                             |
| MO26(2) | 1                               | 0.957                             |
| MO28(1) | 1                               | 0.940                             |
| MO34(1) | 1                               | 0.940                             |
| MO35(1) | 1                               | 0.900                             |
| MO41(1) | 1                               | 0.963                             |
| MO47(2) | 1                               | 0.920                             |
| MO53(2) | 1                               | 0.963                             |
| MO55(2) | 1                               | 0.943                             |
| MO56(1) | 1                               | 0.957                             |
| SM15(1) | 1                               | 0.947                             |
| SO9(2)  | 1                               | 0.940                             |
| SO14(2) | 1                               | 0.963                             |
| SS19(1) | 1                               | 0.960                             |

**Table S4. Tuckey test *post-hoc* outputs on percentage of germination of *M. sativa* cultivars Marina and Etrusca at different NaCl concentrations.** Values in tables indicate means of percentage of germination. Different superscript capital letters indicate results of Tuckey test *post-hoc* among levels of salt stress for each cultivar. Different superscript small letters indicate results of Tuckey test between two cultivars for each concentration of NaCl.

| Cultivar | C- (0.0 mM NaCl)     | 0.5% (85.6 mM NaCl)  | 1.0% (171.1 mM NaCl)   | 1.5% (256.7 mM NaCl) | 2.0% (342.2 mM NaCl) |
|----------|----------------------|----------------------|------------------------|----------------------|----------------------|
| Marina   | 87.20 <sup>B,a</sup> | 84.0 <sup>AB,a</sup> | 75.66 <sup>ABC,a</sup> | 56.0 <sup>AC,a</sup> | 2.36 <sup>C,a</sup>  |
| Etrusca  | 83.86 <sup>A,a</sup> | 83.2 <sup>A,a</sup>  | 81.04 <sup>A,a</sup>   | 63.2 <sup>AB,a</sup> | 5.60 <sup>B,a</sup>  |

**Table S5. Mortality of *M. sativa* cultivars Marina and Etrusca in association with 21 *S. meliloti* in presence of salt.** The percentage of harvested death plants of both cultivars are reported for each concentration of sodium chloride tested in symbiosis with each Algerian strains tested. Mean and standard error values are reported.

|                | Marina    |             | Etrusca   |             |
|----------------|-----------|-------------|-----------|-------------|
|                | 0 mM NaCl | 100 mM NaCl | 0 mM NaCl | 100 mM NaCl |
| <b>Control</b> | 0         | 0           | 11.1      | 0           |
| <b>SM15(1)</b> | 0         | 0           | 22.2      | 33.3        |
| <b>MO28(1)</b> | 0         | 0           | 0         | 11.1        |
| <b>MO53(2)</b> | 0         | 0           | 11.1      | 11.1        |
| <b>MO26(2)</b> | 0         | 0           | 0         | 11.1        |
| <b>MO56(1)</b> | 0         | 16.7        | 22.2      | 66.7        |
| <b>MA10(1)</b> | 0         | 0           | 0         | 22.2        |
| <b>MO34(1)</b> | 0         | 16.7        | 22.2      | 0           |
| <b>SS19(1)</b> | 0         | 0           | 0         | 44.4        |
| <b>MO20(2)</b> | 0         | 0           | 0         | 44.4        |
| <b>MO4(2)</b>  | 0         | 0           | 11.1      | 22.2        |
| <b>MO19</b>    | 0         | 0           | 0         | 33.3        |
| <b>MO55(2)</b> | 0         | 0           | 11.1      | 22.2        |
| <b>SO14(2)</b> | 0         | 0           | 22.2      | 66.7        |
| <b>MO1(1)</b>  | 0         | 16.7        | 0         | 44.4        |
| <b>MO25(1)</b> | 0         | 0           | 11.1      | 55.6        |
| <b>MO41(1)</b> | 0         | 16.7        | 11.1      | 22.2        |
| <b>MO35(1)</b> | 16.7      | 16.7        | 0         | 11.1        |

|                       |      |      |       |       |
|-----------------------|------|------|-------|-------|
| <b>SO9(2)</b>         | 16.7 | 16.7 | 22.2  | 44.4  |
| <b>MO47(2)</b>        | 0    | 0    | 0     | 22.2  |
| <b>MO15(1)</b>        | 0    | 16.7 | 11.1  | 55.6  |
| <b>MA13(2)</b>        | 0    | 16.7 | 11.1  | 55.6  |
| <hr/>                 |      |      |       |       |
| <b>Mean</b>           | 1.52 | 6.06 | 9.09  | 31.82 |
| <b>Standard error</b> | 1.05 | 1.75 | 1. 88 | 4.40  |
| <hr/>                 |      |      |       |       |



**Table S6. Count of viable cells of *S. meliloti* strains on the *M. sativa* cultivar Marina seed coated with compost.** Mean values and standard error of three independent replicate are reported for each strain. Superscript letters indicate results of Tuckey test post-hoc between the *S. meliloti* strains tested.

| Strains | Mean                            | Standard error     |
|---------|---------------------------------|--------------------|
| MO56(1) | $1.56 \times 10^6$ <sup>A</sup> | $2.22 \times 10^5$ |
| MA10(1) | $1.61 \times 10^6$ <sup>A</sup> | $1.47 \times 10^5$ |
| GR4     | $1.50 \times 10^6$ <sup>A</sup> | $2.55 \times 10^5$ |
| MO15(1) | $1.89 \times 10^6$ <sup>A</sup> | $1.11 \times 10^5$ |
| MO35(1) | $1.28 \times 10^7$ <sup>A</sup> | $1.47 \times 10^6$ |
